# Supplementary material
Source: Elsevier journal article supplement (https://www.sciencedirect.com/science/article/pii/S0211699519301985)
Supplement: mmc1 [file S0211699519301985:mmc1.docx]

**Appendix 1** : Selected websites with information on CKD patient education

| World Kidney Day  International Federation of Kidney Foundations.  International Society of Nephrology  USA: American Nephrology Nurse Association  American Association of Kidney Patients   America Renal Associates   (Kidneyman: Patient Education Videos)   Kidney School by Medical Education Institute, INC.   National Kidney Disease Education Program   National Kidney Disease Education Program of National Institute of Diabetes and Digestive and Kidney Diseases   The National Kidney Disease Education Program   National Kidney Foundation   Canada: The Kidney Foundation of Canada   United Kingdom: Kidney care UK   National Kidney Foundation   NHS England   Australia: Kidney Health Australia   The Australian Kidney Foundation   Others National Kidney Foundation India  National Kidney Foundation Malaysia   National Kidney Foundation Singapore   New Mexico Kidney Foundation |
| --- |
